# Supplementary material for: DMSO-based PbI2precursor with PbCl2additive for highly efficient perovskite solar cells fabricated at low temperature
Source: Royal Society of Chemistry journal article supplement (doi:10.1039/c5ra25160e), 2015-01-01
Supplement: c5ra25160e1.pdf [file c5ra25160e1.pdf]

## Supporting Information for

### DMSO-based $\text{PbI}_2$ precursor with $\text{PbCl}_2$ additive for high efficient perovskite solar cells fabricated at low temperature

Zhirong Zhang<sup>a,b</sup>, Xiaopeng Yue<sup>a,c</sup>, Dong Wei<sup>a</sup>, Meicheng Li<sup>a,\*</sup>, Pengfei Fu<sup>a</sup>, Bixia Xie<sup>a</sup>, Dandan Song<sup>a</sup>, Yingfeng Li<sup>a</sup>

<sup>a</sup> State Key Laboratory of Alternate Electrical Power System with Renewable Energy Sources, North China Electric Power University, Beijing, 102206, China

<sup>b</sup> School of Physics and Electromechanical Engineering, HeXi University, Zhangye Gansu, 734000, China

<sup>c</sup> Key Laboratory of Resource Exploration Research of Hebei Province, Hebei University of Engineering, Handan Hebei, 056038, China

E-mail address of Professor Meicheng Li: mcli@ncepu.edu.cn

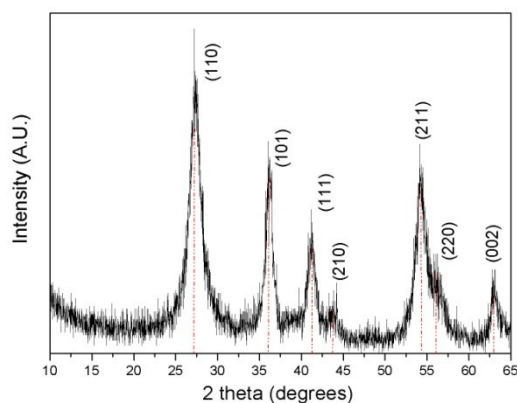

Fig. S1. The XRD patterns of  $\text{TO}_2$  nanocrystalline contact layer prepared by chemical bath deposition method.

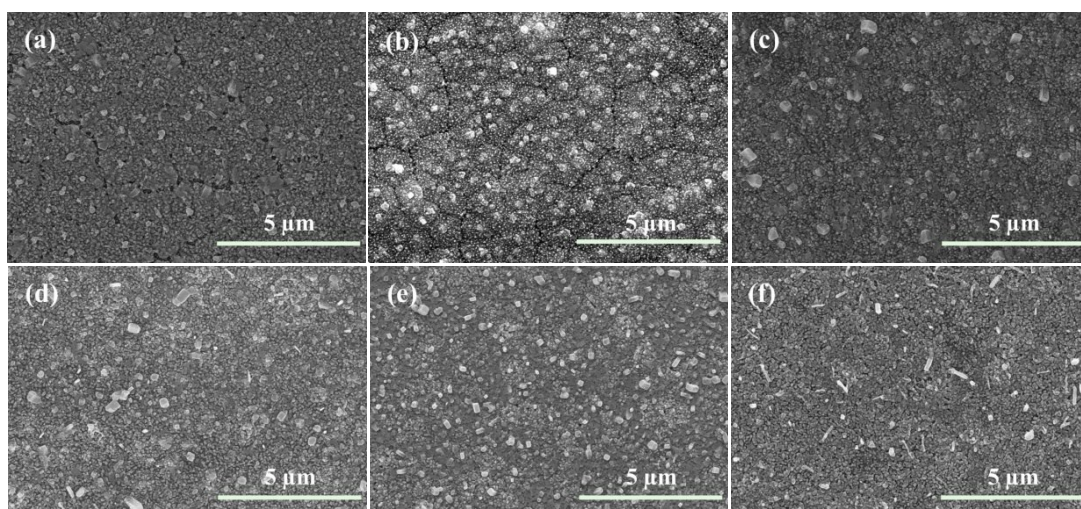

Fig. S2. Top view SEM images (high-magnification) of DMSO-based perovskite films prepared with (a) no, (b) 10 mol %, (c) 30 mol %, (d) 50 mol %, (e) 70 mol % and (f) 90 mol %  $\text{PbCl}_2$  additive, respectively.

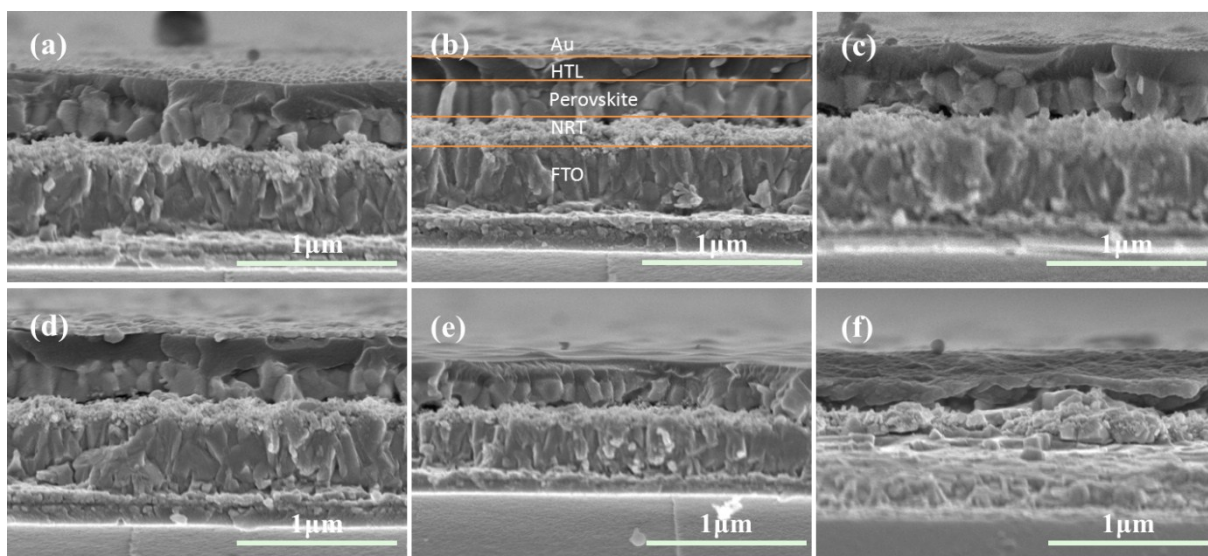

Fig. S3. The cross-section SEM images of the solar cells based on (a) Film b, (b) c, (c) d, (d) e, (e) f and (f) g, respectively.

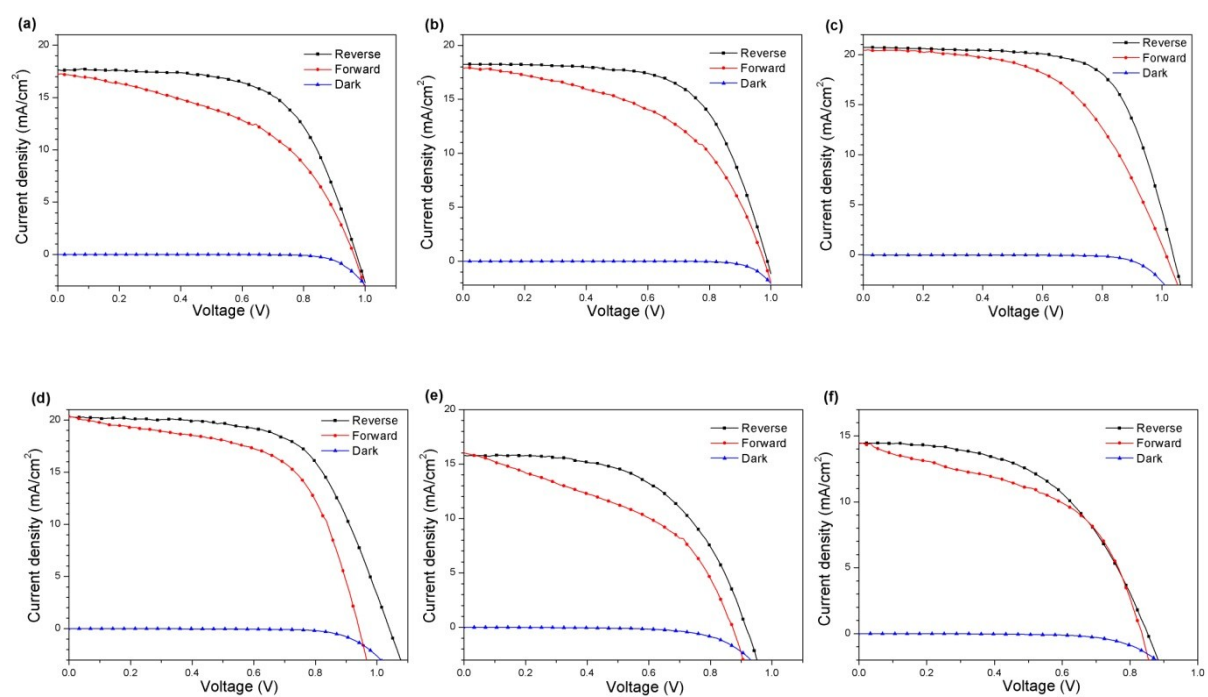

Fig. S4. *J-V* curves (as well as the dark *I-V*) of the solar cells based on (a) Film b, (b) c, (c) d, (d) e, (e) f and (f) g, respectively, with respect to forward and reverse scan direction.
